# Supplementary material for: Left Atrial Diameter and the Risk of Thromboembolism in Patients with Left Ventricular Noncompaction
Source: MDPI journal article supplement (doi:10.3390/jcdd9120426), 2022-11-30
Supplement: s1 [file s1]

# Supplementary Material

## Supplemental Methods

**1. Jenni echocardiographic diagnostic criteria:**

- (1) Coexisting cardiac abnormalities were absent (by definition).
- (2) A two layer structure was seen, with a compacted thin epicardial band and a much thicker non-compacted endocardial layer of trabecular meshwork with deep endomyocardial spaces. A maximal end systolic ratio of non-compacted to compacted layers of > 2 is diagnostic.
- (3) The predominant localisation of the pathology was to mid-lateral (seven of seven patients), apical (six), and mid-inferior (seven) areas. The pathological preparations confirmed the echocardiographic findings. Concomitant regional hypokinesia was not confined to the non-compacted segments.
- (4) There was colour Doppler evidence of deep perfused intertrabecular recesses.

**2. Petersen criteria:**

The ratio of enddiastolic noncompacted to compacted myocardium evaluating through cardiovascular magnetic resonance  $\geq 2.3$

## Supplemental Tables

**Table S1. Detailed information on intracardiac thrombi**

|                                |            |
|--------------------------------|------------|
| Total                          | 14         |
| Left atrial appendage thrombus | 4 (28.6%)  |
| Left ventricular thrombus      | 10 (71.4%) |
